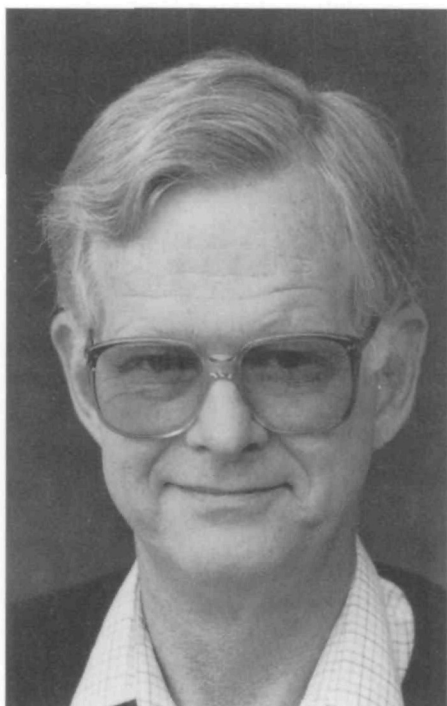

R. McCarty

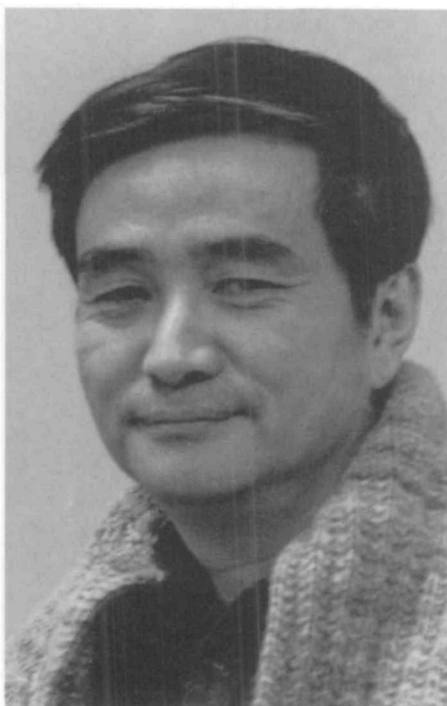

M. Futai

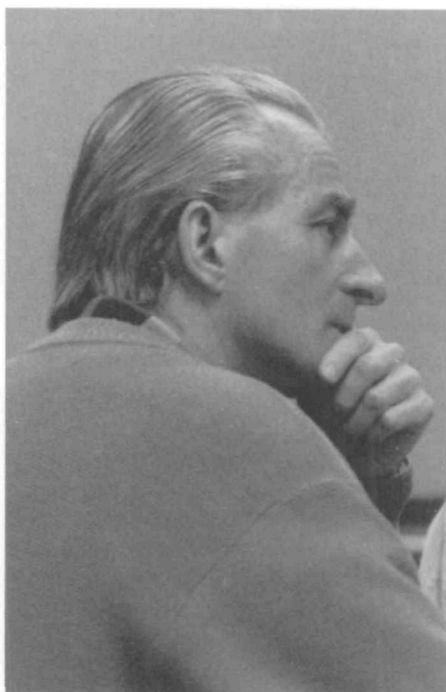

K. Altendorf

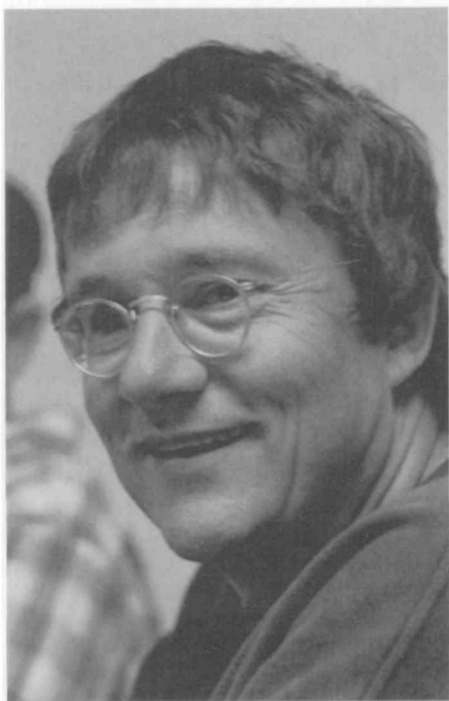

W. Junge

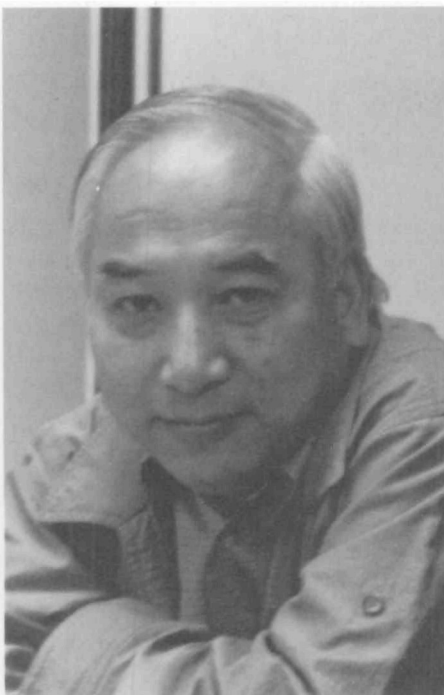

Y. Mukohata

## A PLANT BIOCHEMIST'S VIEW OF H<sup>+</sup>-ATPases AND ATP SYNTHASES

BY RICHARD E. MCCARTY

*Department of Biology, The Johns Hopkins University, Baltimore, MD 21218, USA*

### Introduction

My twenty-five year fascination with membrane ATPases grew out of my experiences in the laboratories of André Jagendorf and Efraim Racker. André introduced me to photosynthetic phosphorylation and Ef, to whose memory this article is dedicated, convinced me that ATPases had much to do with ATP synthesis.

Astounding progress has been made in the H<sup>+</sup>-ATPase field in just two decades. By the early 1970s, it was generally recognized that oxidative and photosynthetic ATP synthesis were catalyzed by membrane enzymes that could act as H<sup>+</sup>-ATPases and that the common intermediate between electron transport and phosphorylation is the electrochemical proton gradient. At that time, it had been shown that a cation-stimulated ATPase activity was associated with plasma membrane preparations from plant roots. The endomembrane or vacuolar ATPases were unknown.

The application of improved biochemical methods for membrane isolation and purification, as well as membrane protein reconstitutions, led rapidly to the conclusion that there are three major classes of membrane H<sup>+</sup>-ATPases, P, V and F. P-ATPases, which will not be considered further in this article, are phosphorylated during their catalytic cycle and have a much simpler polypeptide composition than V- or F-ATPases. The plasma membrane H<sup>+</sup>-ATPase of plant, yeasts and fungal cells is one example of this class of enzymes (see Pedersen and Carafoli, 1987, for a comparison of plasma membrane ATPases).

Biochemical and gene sequencing analysis have revealed that V- and F-ATPases resemble each other structurally, but are distinct in function and origin. The 'V' stands for vacuolar and the 'F' for F<sub>1</sub>F<sub>0</sub>. F<sub>1</sub> was the first factor isolated from bovine heart mitochondria shown to be required for oxidative phosphorylation. F<sub>0</sub> was so named because it is a factor that conferred oligomycin sensitivity to soluble F<sub>1</sub>. Other F-ATPases are often named to indicate their sources. For example, chloroplast F<sub>1</sub> is denoted CF<sub>1</sub> (see Racker, 1965, for early work on F<sub>1</sub>). Recent successes in reconstitution of vacuolar ATPase have led to a V<sub>1</sub>V<sub>0</sub> nomenclature for this enzyme as well.

The term 'ATP synthase' is now in general use to describe F-ATPases. This term emphasizes the facts that although F-ATPases function to synthesize ATP, they do not catalyze, normally, ATP hydrolysis linked to proton flux. In contrast, V-ATPases are very unlikely to operate as ATP synthases. Thus, F-ATPases are proton gradient consumers, whereas V-ATPases generate proton gradients at the expense of hydrolysis.

Key words: ATP synthesis, ATP hydrolysis, F<sub>1</sub>F<sub>0</sub>, ATP synthase.

In this brief review, I will compare the structures of F- and V-ATPases. Also, I give some insight into the mechanisms that help prevent wasteful ATP hydrolysis by the chloroplast ATP synthase (CF<sub>1</sub>F<sub>0</sub>).

Structure of F- and V-ATPases

Both F- and V-ATPases are structurally complex. CF<sub>1</sub>F<sub>0</sub>, for example, contains nine different proteins and a total of about twenty polypeptide chains (Jagendorf *et al.* 1991). The *M<sub>r</sub>* of V- and F-ATPases is approximately 550 000–650 000. The complexity of these enzymes is puzzling. This is especially true in view of the fact that P-ATPases can be as simple as a single polypeptide chain of about 100 000 *M<sub>r</sub>*. Genetic studies with *Escherichia coli* have established that each of the eight *E. coli* F<sub>1</sub>F<sub>0</sub> polypeptides is required for function (Futai *et al.* 1989).

F-ATPases may be readily separated into two parts – F<sub>1</sub>, the catalytic sector and F<sub>0</sub>, the proton translocating part. F<sub>1</sub> can be removed from many coupling membranes either by physical means or simply by diluting membranes into media of low ionic strength that contain EDTA. F<sub>1</sub> is, thus, an extrinsic membrane protein. Once removed from the membrane, F<sub>1</sub> is soluble to at least 100 mg ml<sup>-1</sup>. From 2 kg of spinach leaves, 400 mg of CF<sub>1</sub>, greater than 95 % pure, may be prepared in a day and a half. This ease of preparation makes one less reluctant to engage in calorimetric or equilibrium nucleotide binding studies that can require as much as 100 mg of CF<sub>1</sub> for each experiment. Depending on the source, the *M<sub>r</sub>* of F<sub>1</sub> ranges from 365 000 to 400 000.

From all sources, mitochondrial, chloroplast and eubacterial plasma membranes, the subunit composition of F<sub>1</sub> is similar. There are five different proteins, labelled α–ε in order of decreasing *M<sub>r</sub>*. There is a consensus that these polypeptides are present in a 3:3:1:1:1 stoichiometry (Table 1). The primary sequence of a large number of F<sub>1</sub> polypeptides has either been deduced from gene sequences or determined chemically. From sequence comparisons, three striking facts were revealed. First, the sequence of the β subunit has been remarkably conserved, even across Kingdom lines (Hudson and Mason, 1988; Walker and Cozens, 1986). For example, the β subunit of CF<sub>1</sub> and *E. coli* F<sub>1</sub> have 76 % sequence identity. Second, the α and β subunits are related and it seems quite possible that α arose by gene duplication. Third, the smaller subunits, γ, δ and ε, are not well conserved. In fact, ε of mitochondrial F<sub>1</sub> does not resemble CF<sub>1</sub> ε or *E. coli* F<sub>1</sub> ε

Table 1. Subunit composition of some ATP synthases

| Source         | Extrinsic polypeptides<br>F <sub>1</sub> |    |    |    |    | Intrinsic polypeptides<br>F <sub>0</sub> |    |                              |     |
|----------------|------------------------------------------|----|----|----|----|------------------------------------------|----|------------------------------|-----|
|                | α                                        | β  | γ  | δ  | ε  | a                                        | b  | c                            |     |
| <i>E. coli</i> | 55                                       | 50 | 31 | 19 | 15 | 30                                       | 17 | 8                            |     |
|                |                                          |    |    |    |    | IV                                       | I  | II                           | III |
| Chloroplasts   | 55                                       | 54 | 36 | 21 | 15 | 27                                       | 17 | 14                           | 8   |
| Mitochondria   | 55                                       | 52 | 30 | 20 | 15 | 30                                       | 20 | 8+at least five polypeptides |     |

Numbers shown are *M<sub>r</sub>* values×10<sup>-3</sup>. (Adapted from Nelson, 1989.)

at all and mitochondrial F<sub>1</sub>  $\delta$  is also unique (Walker and Cozens, 1986). The bacterial and chloroplast  $\delta$  subunits resemble oligomycin sensitivity conferral protein (OSCP) which is considered to be an F<sub>0</sub> subunit. Thus, generalizations about subunit function based simply on  $M_r$  can be problematic.

From image reconstruction electron microscopy (Boekema *et al.* 1988), distance mapping by fluorescence energy transfer (McCarty and Hammes, 1987) and X-ray diffraction (Bianchet *et al.* 1991), the structure of F<sub>1</sub> is emerging (Fig. 1). The structure is dominated by the  $\alpha/\beta$  hexamer. The  $\alpha$  subunits are in contact with the  $\beta$  subunits, but the  $\alpha$  subunits are closer to the membrane surface. The position of the  $\gamma$  subunit is not exactly known, but it is likely that it is centrally located in an asymmetrical manner. The  $\epsilon$  subunit interacts strongly with  $\gamma$ , and  $\delta$  is placed close to the membrane surface because of its role in F<sub>1</sub> binding to F<sub>0</sub>.

The inherent structural asymmetry of F<sub>1</sub> is intriguing. The  $\alpha$  and  $\beta$  subunits cannot be in equivalent environments. That is, the interactions of a given  $\alpha$  or  $\beta$  subunit in the complex with the smaller subunits must differ from those of another  $\alpha$  and  $\beta$  subunit. There is evidence to suggest that CF<sub>1</sub> lacking the  $\delta$  and  $\epsilon$  subunits retains its structural asymmetry (Shapiro *et al.* 1991). Thus, interactions of the  $\gamma$  subunit with  $\alpha$  and  $\beta$  may be the major asymmetry inducers.

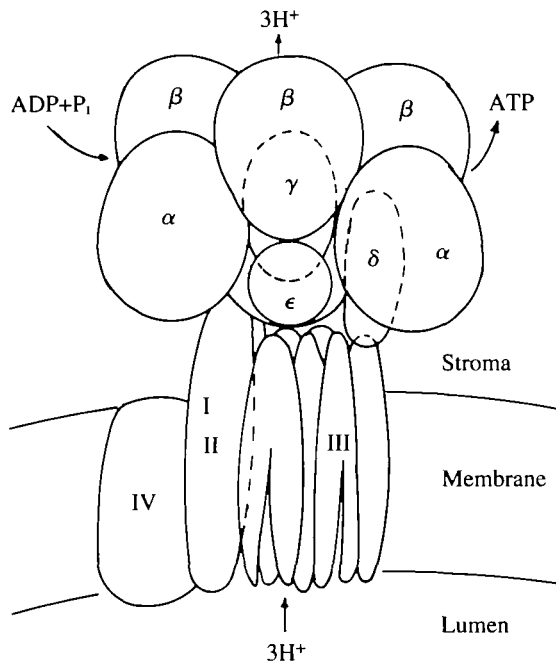

Fig. 1. A depiction of the chloroplast ATP synthase (CF<sub>1</sub>F<sub>0</sub>). The model of CF<sub>1</sub> is supported by electron microscopy and image reconstruction, fluorescence resonance energy transfer distance mapping of specific residues on various CF<sub>1</sub> subunits and the arrangement of the  $\alpha$  and  $\beta$  subunits is in accord with the X-ray diffraction results for mitochondrial F<sub>1</sub>. The arrangement of CF<sub>0</sub> subunits is entirely speculative. Courtesy of Dr Carolyn Wetzel.

The structural asymmetry of  $F_1$  probably explains the nucleotide binding site asymmetry as well as the unusual reactivity of Lys-378 of the  $\alpha$  subunit of  $CF_1$ . Only one of the three  $\alpha$  subunits of  $CF_1$  reacts at this position rapidly with Lucifer Yellow vinyl sulfone. The six nucleotide binding sites of  $F_1$  show quite different properties. The most plausible model for the mechanism of  $F_1$  is one in which two or three catalytic sites change their properties during the catalytic cycle (Boyer, 1989). In this alternating site or binding change mechanism, catalytic sites alternate between very high affinity and much lower affinity. The binding of substrate to one catalytic site promotes catalysis and product release from another. If this mechanism holds, and there is much evidence in its favor,  $F_1$  cannot be permanently frozen in one asymmetrical state. The incubation of  $CF_1$  with  $Mg^{2+}$ -ATP was found to cause two nucleotide binding sites on  $CF_1$  to switch their properties (Shapiro and McCarty, 1990). This observation is consistent with the binding change mechanism. How substrate binding affects changes in the enzyme is unknown.

Although all five *E. coli*  $F_1$  or  $CF_1$  subunits are required for ATP synthesis,  $\alpha_3\beta_3\gamma$  complexes exhibit the highest ATPase activity. An intact  $\gamma$  subunit, however, is not required for ATPase activity and some ATPase activity is seen in  $\alpha/\beta$  complexes (see, for example, Kagawa *et al.* 1989). Although it probably bears the catalytic sites, isolated  $\beta$  is a very poor ATPase. In  $CF_1$ ,  $\gamma$  definitely plays a regulatory role and has been proposed to be involved in proton translocation. The  $\delta$  subunit is required for the binding of *E. coli*  $F_1$  to  $F_0$  and is necessary for the functional binding of  $CF_1$  to  $CF_0$ . In *E. coli* and chloroplast  $F_1$ ,  $\epsilon$  is an inhibitory subunit, probably involved in regulation of the enzymes. These studies are summarized by Futai *et al.* (1989) and Jagendorf *et al.* (1991).

Different coupling membranes seem to have tailored the  $F_0$  portion of the ATP synthase to suit their needs. By definition,  $F_0$  is that part of the ATP synthase that remains after removal of  $F_1$ . Unlike  $F_1$ ,  $F_0$  is hydrophobic and can only be isolated from membranes by detergent extraction. *E. coli*  $F_0$  (Deckers-Hebestreit and Altendorf, 1992) and chloroplast  $F_0$  have been purified in active forms.  $F_0$  functions in at least two ways: it binds  $F_1$  and translocates protons across the membrane. The rates of proton conductance through  $CF_0$  are high, suggesting that the  $F_0$  proton translocation mechanism is a proton-selective channel (Lill and Junge, 1989; Junge *et al.* 1992).

The number of different polypeptides in  $F_0$  varies with the source (Table 1). *E. coli*  $F_0$  is the simplest, with just three polypeptides, labeled *a*, *b* and *c*. Spinach  $CF_0$  has four polypeptides, denoted in Roman numerals, I–IV. Mitochondrial  $F_0$  can have as many as eight polypeptides. All  $F_0$  subunits contain a small (8000  $M_r$ ) hydrophobic polypeptide, referred to as the proteolipid or DCCD-binding protein. There is no lipid covalently attached to the DCCD-binding protein. This polypeptide is present in 6–12 copies per ATP synthase. Remarkably, the reaction of just one copy of the protein with DCCD (*N,N'*-dicyclohexylcarbodiimide) at a specific glutamyl or aspartyl residue is sufficient to inhibit ATP synthesis totally. ATP synthesis is inhibited by DCCD because proton transport through  $F_0$  is blocked. All three *E. coli*  $F_0$  subunits are required for proton translocation and at least subunits III and IV of chloroplast  $F_0$  are necessary for proton transport.

Cross-linking studies indicate that several  $CF_0$  subunits interact with  $CF_1$ . Some  $CF_0$  subunits have hydrophilic domains that are predicted to extend out from the stromal side

of the membrane; that is, towards CF<sub>1</sub>. Subunit III of CF<sub>0</sub> appears to bind to CF<sub>1</sub> with sufficient strength to allow the purification of a CF<sub>1</sub>-subunit III complex by a chromatographic procedure (C. Wetzel and R. McCarty, unpublished observations). This complex retains some of the properties characteristic of the CF<sub>1</sub>F<sub>0</sub> from which it was prepared. Probably, all CF<sub>0</sub> subunits are in contact with one or more CF<sub>1</sub> polypeptides. The dominant interactions have yet to be determined.

Like F-ATPases, V-ATPases consist of an extrinsic component, called V<sub>1</sub>, and a membrane-associated part, now denoted V<sub>0</sub>. The treatment of yeast, *Neurospora crassa*, or oat root vacuolar membranes and clathrin-coated vesicles with KI or KNO<sub>3</sub> in the presence of Mg<sup>2+</sup>-ATP rapidly inactivates ATPase activity and associated proton pumping. Depending on the source, about five polypeptides are dissociated from the membrane by this treatment (see, for example, Ward *et al.* 1992). The dissociated polypeptides were devoid of ATPase activity by themselves, but, in the case of the clathrin-coated vesicles (Puopolo *et al.* 1992) and oat root systems (Ward *et al.* 1992), could be added back to the depleted membranes to give both ATPase activity and ATP-dependent proton pumping. It is of interest to note that membranes from which the V<sub>1</sub> components had been removed were not leaky to protons. Thus, either V<sub>0</sub> required a V<sub>1</sub> polypeptide(s) for proton transport or the attachment of V<sub>1</sub> helps to open a proton gating mechanism.

To an F<sub>1</sub> person, the subunit composition of V-ATPases is somewhat confusing. Then again, to a V<sub>1</sub> person, I would venture to guess that the composition of F-ATPases would also be confusing. As is the case for F-ATPases, V-ATPases seem to retain a similar subunit structure for V<sub>1</sub>, but tailor the membrane-associated components to fit the needs of the membrane (Nelson, 1989). The situation is made even more complicated by the possibility that a given tissue within an organism could possess a V-ATPase that differs from that in another tissue.

Regardless of the apparent heterogeneity of the subunit composition of V-ATPases, there are, as is the case for F-ATPases, recurrent themes. V-ATPases are oligomeric and contain both a peripheral, catalytic component V<sub>1</sub> and an integral membrane part, called V<sub>0</sub> by analogy to F<sub>0</sub> (Table 2). All V-ATPases so far examined from animal, plant, fungal and yeast sources contain two easily discernable polypeptides of about 70 000 (the A subunit) and 60 000 *M<sub>r</sub>* (the B subunit). Based on covalent binding of -SH alkylating reagents and photoaffinity nucleotide binding, it is very likely that the A subunit is catalytic. The function of the B subunit is unknown. The A subunits of various V-ATPases share remarkable amino acid sequence similarity. Remarkably, the catalytic subunits of ATP synthases of archaebacterial ATPases are more closely related to V-ATPases than to F-ATPases. Nonetheless, the A subunits of both archaebacterial and V-ATPases share significant sequence homology with the β subunits of F<sub>1</sub> (22–26 %) (Ihara *et al.* 1992). Moreover, the B subunits of V-ATPases are homologous with the α subunits of F<sub>1</sub> (20–27 %). See Nelson (1992) for a more complete description of the sequence homologies.

In addition to subunits A and B, V-ATPases from a number of membranes contain polypeptides ranging in relative molecular mass from 100 000–115 000 to 12 000–13 000. Most V-ATPases contain polypeptides (four or five) in the 30 000–45 000 *M<sub>r</sub>* range. All

Table 2. *Subunit composition of some V-ATPases*

| Source             | Extrinsic polypeptides* |    |    |    |    | Intrinsic polypeptides† |    |    |
|--------------------|-------------------------|----|----|----|----|-------------------------|----|----|
|                    | V <sub>1</sub>          |    |    |    |    | V <sub>o</sub>          |    |    |
|                    | A                       | B  | C  | D  | E  |                         |    |    |
| Chromatin granules | 73                      | 58 | 40 | 34 | 33 | 100                     | 19 | 17 |
| Yeast              | 69                      | 60 | 42 | 36 | 32 | 100                     | 27 | 17 |
| Oat root           | 70                      | 60 | 44 | 41 | 36 | 16                      | 13 | 12 |
| Red beet           | 67                      | 55 | 52 | 44 | 42 |                         | 16 |    |
| Archaeobacterial   | 64                      | 54 | 28 |    |    |                         | 9  |    |

\*Defined by their ease of removal from vacuolar membranes by chaotropic anion treatment in the presence of  $\text{Mg}^{2+}$ -ATP. The numbers are  $M_r$  values ( $\times 10^{-3}$ ) of the peptides.

†Subunits left behind after chaotroph/ATP treatment. The numbers are  $M_r$  values ( $\times 10^{-3}$ ) of the polypeptides.

so far contain a 16 000  $M_r$  protein that has the solubility properties of a 'proteolipid' and binds DCCD. As is the case for F-ATPases, DCCD inhibits V-ATPase activity and associated proton pumping. It is quite possible that the V-ATPase DCCD-binding protein arose by gene duplication. Some V-ATPases appear to contain a high  $M_r$  (100 000–115 000) polypeptide and others a low  $M_r$  (12 000–13 000  $M_r$ ) polypeptide.

V-ATPases are sensitive to inhibition by chaotrophic anions ( $\text{I}^-$ ,  $\text{NO}_3^-$  or  $\text{SCN}^-$ ) in a manner that is fascinatingly dependent on the presence of  $\text{Mg}^{2+}$ -ATP (Moriyama and Nelson, 1989). A number of polypeptides dissociate from the membrane as a result of this treatment; others are left behind. Concomitant with loss of ATPase activity and associated protein pumping, more or less spherical particles of 10–12 nm are removed from vacuolar membranes (Bowman *et al.* 1992).

The peripheral portion ( $V_1$ ) is defined as that part removed by chaotroph treatment in the presence of  $\text{Mg}^{2+}$ -ATP. The A and B subunits, probably present in a 3:3 stoichiometry with respect to the smaller polypeptides, are clearly in this class. In addition, the polypeptides in the 30 000–45 000  $M_r$  range are removed by this treatment. Recently yeast subunit C ( $M_r$  42 000) was cloned and sequenced (Beltran *et al.* 1992). Subunit C was shown to be required for assembly and exhibited no homology to the  $\gamma$  subunit of  $F_1$ . What is left after chaotroph treatment is defined as  $V_o$ . There is a consensus that the 16 000  $M_r$  DCCD-binding protein, which is probably present in multiple copies, is part of  $V_o$ . The approximately 100 000  $M_r$  polypeptide of some V-ATPases as well as smaller proteins (12 000–20 000  $M_r$ ) may also be part of  $V_o$ . Further analysis is required and will undoubtedly be forthcoming.

There are several observations that point to major differences between V- and F-ATPases, even though superficially they seem similar. Removal of  $F_1$  greatly increases the proton permeability of the membrane in which it resides. This effect is not observed for V-ATPases. Perhaps some  $V_1$  component remains associated with  $V_o$  after chaotroph treatment and blocks a proton conductance mechanism. Alternatively, a  $V_1$  component is required for proton transport through  $V_o$ . So far  $V_1$  has not been released from the

## Regulation of CF<sub>1</sub>F<sub>0</sub>

$$3\text{H}_{\text{in}}^{+} + \text{ADP} + \text{P}_i \rightleftharpoons 3\text{H}_{\text{out}}^{+} + \text{ATP} + \text{H}_2\text{O}.$$

Thylakoid membranes, as usually isolated, hydrolyze  $\text{Mg}^{2+}$ -ATP in the dark, even at  $37^\circ\text{C}$ , at rates close to  $0.05 \mu\text{mol min}^{-1} \text{mg}^{-1}$  protein. Much of this activity may be attributed to phosphohydrolases that contaminate the preparations. In contrast, the same membranes, when illuminated, can catalyze ATP synthesis at rates in excess of  $5 \mu\text{mol min}^{-1} \text{mg}^{-1}$  protein. It is clear, then, that light dramatically activates the chloroplast ATP synthase. The ATP synthases have evolved to be specialists in ATP synthesis and, through a number of different mechanisms, potentially wasteful ATP hydrolysis by  $\text{CF}_1\text{F}_0$  is prevented.

It must be emphasized that the effect of light is indirect. Transthylakoid electrochemical proton gradients drive ATP synthesis in total darkness and, thus, are also involved in the conversion of the ATP synthase to an active form. Light-driven electron flow generates proton gradients that serve two functions in photophosphorylation. First, the proton gradient is the driving force for ATP synthesis and, second, it is required for activation.

How this unusual ‘one way’ regulation occurs at the molecular level is beginning to be revealed. A coherent picture, summarized in Fig. 2, of what may happen in a dark-to-light transition can now be drawn. The  $\epsilon$  subunit is an inhibitor of the ATPase activity of  $CF_1$ .

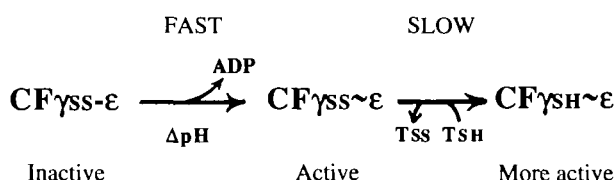

Fig. 2. A scheme for the activation of the chloroplast ATP synthase. CF stands for the CF<sub>1</sub> part of the ATP synthase.  $\gamma_{SS}$  and  $\gamma_{SH}$  are oxidized (disulfide) and reduced (dithiol) forms of the  $\gamma$  subunit, respectively. TSS and TSH are oxidized and reduced thioredoxin, respectively. In the absence of  $\Delta pH$ , CF<sub>1</sub> contains tightly bound ADP, and  $\epsilon$  and  $\gamma$  interact strongly, as indicated by the bold arrows. Rapid changes in the enzyme induced by  $\Delta pH$  formation by electron transport in the light cause ADP release and weaken  $\gamma$ - $\epsilon$  interactions (as shown by ~). Although the oxidized enzyme in this state is active, further activation occurs upon reduction of the  $\gamma$  disulfide by reduced thioredoxin.

By necessity, it must also inhibit ATP synthesis. The  $\epsilon$  and  $\gamma$  subunits interact and it is probable that the inhibitory effects of  $\epsilon$  are mediated at least in part through the  $\gamma$  subunit. In the dark,  $\epsilon$  interacts very strongly with  $\gamma$  and the ATPase activity is inhibited. Generation of the electrochemical proton gradient causes changes in CF<sub>1</sub> that involve both the  $\gamma$  and  $\epsilon$  subunits (at least). A movement of  $\epsilon$  relative to  $\gamma$  is indicated. In their new conformations,  $\epsilon$  inhibition could be nullified.

Redox regulation is also involved in the physiologically significant light activation of CF<sub>1</sub> in chloroplasts. The  $\gamma$  subunit of CF<sub>1</sub> from photosynthetic eukaryotes contains an insert of about twenty amino acids that is absent in *E. coli* or mitochondrial F<sub>1</sub> subunits (Jagendorf *et al.* 1991). This insert contains a redox-active pair of Cys residues (Cys-199 and Cys-205 for spinach CF<sub>1</sub>  $\gamma$  subunit). In the dark, Cys-199 and Cys-205 form a disulfide bond, whereas in the light this disulfide (the only disulfide in CF<sub>1</sub>) is reduced. Thioredoxin, reduced by electrons from photosystem I, is probably the physiological reductant.

Although oxidized CF<sub>1</sub> is active in ATP synthesis, reduced CF<sub>1</sub> is even more active. At physiological values of the electrochemical proton gradient, phosphorylation could be enhanced as much as tenfold (Quick and Mills, 1986). Essentially, it appears that the energy cost for activation is significantly decreased by reduction of the  $\gamma$  disulfide bond.

The activated state of oxidized CF<sub>1</sub> in thylakoids decays quite quickly in the dark. Thus, after a period of illumination, little ATPase activity is observed in the dark. After reduction of the  $\gamma$  disulfide bond, however, significant ATPase activity persists in the dark after a period of illumination (Bakker-Grunwald, 1977). This ATPase activity is coupled to inward proton fluxes and can generate  $\Delta$ pH values of sufficient magnitude to permit ATP synthesis at a relatively low rate. Proton ionophores at concentrations that collapse the proton gradient completely abolish ATPase activity in the dark. The  $\Delta$ pH generated by ATP hydrolysis in the dark by CF<sub>1</sub> in reduced thylakoids is, thus, sufficient to keep the enzyme, at least in part, in an active form. During illumination, ATP hydrolysis is prevented by the high value of  $\Delta$ pH which drives the reaction in the direction of synthesis (Davenport and McCarty, 1986).

In intact chloroplasts, the ability of reduced CF<sub>1</sub> to hydrolyze ATP in the dark after a period of illumination is lost over a period of several minutes in a biphasic manner. The more rapid phase is probably a consequence of the binding of ADP to a nucleotide binding site on CF<sub>1</sub>. ADP at micromolar concentrations rapidly inactivates the ATPase of reduced CF<sub>1</sub> in the dark, without causing oxidation of the  $\gamma$  subunit, dithiol. To reconvert the CF<sub>1</sub> to an active form after ADP has bound,  $\Delta$ pH is required and ADP is released from the enzyme. The second, slower phase of the inactivation of CF<sub>1</sub>F<sub>0</sub> in intact chloroplasts in the dark is the oxidation of the dithiol by an unknown mechanism (Biaudet *et al.* 1988).

There is good evidence that the  $\epsilon$  and  $\gamma$  polypeptides of CF<sub>1</sub> interact. They are physically close together (McCarty and Hammes, 1987) and alterations of the  $\gamma$  subunit modify  $\epsilon$ -CF<sub>1</sub> interactions (Soteropoulos *et al.* 1992). Reduction of the  $\gamma$  disulfide decreases the affinity of  $\epsilon$  binding to CF<sub>1</sub> about 20-fold and tryptic cleavage of a portion of the C terminus of  $\gamma$  abolishes high-affinity  $\epsilon$  binding. Removal of the  $\epsilon$  subunit markedly enhances the rate of reduction of  $\gamma$  disulfide by dithiothreitol or thioredoxin (Dann and McCarty, 1992). The  $\gamma$  subunit in CF<sub>1</sub> depleted in  $\epsilon$  is easily attacked by

proteases, with the initial major cut occurring close to the  $\gamma$  disulfide to produce a  $\gamma$  fragment of about 27 000  $M_r$ . If the  $\gamma$  disulfide is reduced, a second cut occurs that releases a peptide of  $M_r$  1300. This peptide bears Cys-205.

The  $\gamma$  subunit of CF<sub>1</sub> in thylakoids in darkness is resistant to proteolysis. With the increase of  $\Delta pH$  in the light, however, changes in the enzyme occur that render  $\gamma$  very susceptible to partial proteolysis. The  $\gamma$  subunit is cleaved to a fragment of 27 000  $M_r$  and, if the disulfide is reduced, the same second cut that occurs in CF<sub>1</sub> deficient in  $\epsilon$  is observed. Thus, with respect to the susceptibility of the  $\gamma$  subunit to protease attack, CF<sub>1</sub> in illuminated thylakoids resembles CF<sub>1</sub> deficient in  $\epsilon$ .

Mitochondrial F<sub>1</sub>F<sub>0</sub> is regulated by a quite different mechanism from that of CF<sub>1</sub>F<sub>0</sub>. The  $\epsilon$  subunit of mitochondrial F<sub>1</sub> has no sequence similarity to that of CF<sub>1</sub> or *E. coli* F<sub>1</sub>. Mitochondrial  $\epsilon$  does not appear to be an inhibitor of the ATPase activity of mitochondrial F<sub>1</sub>. Instead, mitochondrial F<sub>1</sub> activity is regulated by an inhibitor protein (or proteins) that, unlike  $\epsilon$ , is not considered to be part of F<sub>1</sub> (reviewed by Cross, 1981). The binding of the inhibitor protein is favored by ATP. In contrast, the inhibitor protein is released from the complex when the magnitude of the electrochemical proton gradient and the ADP/ATP ratio are high. Thus, ATP synthesis would be favored.

There is no evidence for an inhibitor protein other than  $\epsilon$  in either *E. coli* or chloroplasts. Moreover, it is very clear that  $\epsilon$  dissociation from CF<sub>1</sub> cannot be a part of the activation process. CF<sub>1</sub> deficient in  $\epsilon$  binds to CF<sub>0</sub> equally as well as CF<sub>1</sub>, but  $\epsilon$ -depleted CF<sub>1</sub> cannot restore ATP synthesis (Richter *et al.* 1984). When CF<sub>1</sub> is removed from thylakoid membranes the membranes become highly proton permeable because of proton leakage through CF<sub>0</sub>. The permeability is so high that even extremely rapid proton translocation by light-dependent electron transport does not generate a significant  $\Delta pH$ . CF<sub>1</sub> deficient in  $\epsilon$  fails to block the CF<sub>0</sub> proton channel and, thus, cannot restore ATP synthesis to CF<sub>1</sub>-depleted thylakoids. If  $\epsilon$  were to dissociate from CF<sub>1</sub> during activation, therefore, ATP synthesis would be inhibited.

The  $\epsilon$  subunit is also an inhibitor of the ATPase activity of *E. coli* F<sub>1</sub> and has been shown to interact strongly with  $\gamma$  (Dunn, 1982). The *E. coli* ATP synthase can operate as an H<sup>+</sup>-ATPase *in vivo*. For example, when respiratory chain activity is low, ATP hydrolysis by ATP synthase powers proton efflux to generate an electrochemical proton gradient. It is likely that the activity of the enzyme is regulated since the ATPase activity of the *E. coli* ATP synthase in its natural environment is much lower than the  $V_{max}$ . An energy-dependent activation mechanism which involves the overcoming of  $\epsilon$  inhibition may occur in *E. coli* F<sub>1</sub>F<sub>0</sub> as well as in other ATP synthases.

The dual activities of the  $\epsilon$  subunit of CF<sub>1</sub> (regulation and proton channel blocking) suggest an intriguing connection between activation and opening of a 'proton gate'. The proton conductivity through CF<sub>1</sub>F<sub>0</sub> is normally low when the enzyme is inactive, but is high (greater than 1 ms<sup>-1</sup>) during ATP synthesis. Could it be that activation entails – at least in part – an opening of the proton gate? In which part of the ATP synthase protons induce the conformational changes involved in activation and proton gate opening is unknown. Protonation of a CF<sub>0</sub> subunit(s) in contact with CF<sub>1</sub> could induce the changes. Alternatively, CF<sub>0</sub> could act passively to deliver protons to a site on one or more of the CF<sub>1</sub> subunits.

To date, little is known about regulation of V-ATPases. By analogy to the  $F_1F_0$ -ATPases, I predict that one or more of the smaller polypeptides of  $V_1$  will be a regulatory subunit. As is the case for mitochondrial  $F_1$ , a dissociable inhibitory protein could be involved.

### References

- BAKKER-GRUNWALD, T. (1977). ATPase. In *Photosynthesis I* (ed. A. Trebst and M. Avron). New York: Springer-Verlag.
- BELTRAN, C., KOPECKY, J., PAN, Y. C. E., NELSON, H. AND NELSON, N. (1992). Cloning and mutational analysis of the gene encoding subunit C of yeast vacuolar  $H^+$ -ATPase. *J. biol. Chem.* **267**, 774–779.
- BIANCHET, M., YSERN, X., HULLIHAN, J., PEDERSEN, P. L. AND AMZEL, L. M. (1991). Mitochondrial ATP synthase. Quaternary structure of the  $F_1$  moiety at 3.6 Å determined by X-ray diffraction. *J. biol. Chem.* **266**, 21197–21201.
- BIAUDET, P., DE KOUCHKOVSKY, F. AND HARAUX, F. (1988).  $\Delta pH$  activation of the thiol-modified chloroplast ATP hydrolase. Nucleotide binding effects. *Biochim. biophys. Acta* **933**, 487–500.
- BOEKEMA, E. J., VAN HEEL, M. AND GRABER, P. (1988). Structure of the ATP synthase from chloroplasts studied by electron microscopy and image processing. *Biochim. biophys. Acta* **933**, 365–371.
- BOWMAN, B. J., DSCHIDA, W. J. AND BOWMAN, E. J. (1992). Vacuolar ATPase of *Neurospora crassa*: electron microscopy, gene characterization and gene inactivation/mutation. *J. exp. Biol.* **172**, 57–66.
- BOYER, P. D. (1989). A perspective of the binding change mechanism for ATP synthesis. *FASEB J.* **3**, 365–371.
- CROSS, R. L. (1981). The mechanism and regulation of ATP synthesis by  $F_1$ -ATPases. *A. Rev. Biochem.* **50**, 681–714.
- DANN, M. S. AND MCCARTY, R. E. (1992). Characterization of the activation of membrane-bound and soluble  $CF_1$  by thioredoxin. *Plant Physiol.* **99**, 153–160.
- DAVENPORT, J. W. AND MCCARTY, R. E. (1986). Relationships between rates of steady-state ATP synthesis and the magnitude of the proton-activity gradient across thylakoid membranes. *Biochim. biophys. Acta* **851**, 136–145.
- DECKERS-HEBESTREIT, G. AND ALTENDORF, K. (1992). The  $F_0$  complex of the proton-translocating F-type ATPase of *Escherichia coli*. *J. exp. Biol.* **172**, 451–459.
- DUNN, S. D. (1982). The isolated  $\gamma$  subunit of *Escherichia coli*  $F_1$  ATPase binds the  $\epsilon$  subunit. *J. biol. Chem.* **257**, 7354–7359.
- FUTAI, M., NOUMI, T. AND MAEDA, M. (1989). ATP synthase ( $H^+$ -ATPase): Results by combined biochemical and molecular biological approaches. *A. Rev. Biochem.* **58**, 111–136.
- HUDSON, G. S. AND MASON, J. G. (1988). The chloroplast genes encoding subunits of the  $H^+$ -ATP synthase. *Photosyn. Res.* **18**, 205–222.
- IHARA, K., ABE, T., SUGIMURA, K. AND MUKOHATA, Y. (1992). Halobacterial A-ATP synthase in relation to V-ATPase. *J. exp. Biol.* **172**, 475–485.
- JAGENDORF, A. T., MCCARTY, R. E. AND ROBERTSON, D. (1991). Coupling factor components: Structure and function. In *Cell Culture and Somatic Cell Genetics of Plants* (ed. L. Bogorad and I. K. Vasil), vol. 7B, pp. 225–254. New York: Academic Press.
- JUNGE, W., ENGELBRECHT, S., GRIWATZ, C. AND GROTH, G. (1992). The chloroplast  $H^+$ -ATPase: partial reactions of the proton. *J. exp. Biol.* **172**, 461–474.
- KAGAWA, Y., OHTA, S. AND OTAWARA-HANAMOTO, Y. (1989).  $\alpha_3\beta_3$  complex of thermophilic ATP synthase: Catalysis without the  $\gamma$  subunit. *FEBS Lett.* **249**, 67–69.
- LILL, H. AND JUNGE, W. (1989).  $CF_0$ , the proton channel of the chloroplast ATP synthase. After removal of  $CF_1$  it appears in two forms with highly different proton conductance. *Eur. J. Biochem.* **179**, 459–467.
- MCCARTY, R. E. AND HAMMES, G. G. (1987). Molecular architecture of chloroplast coupling factor 1. *Trends biochem. Sci.* **12**, 234–237.
- MORIYAMA, Y. AND NELSON, N. (1989). Cold inactivation of vacuolar proton-ATPases. *J. biol. Chem.* **264**, 3577–3582.
- NELSON, N. (1989). Structure, molecular genetics and evolution of vacuolar  $H^+$ -ATPases. *J. Bioenerg. Biomembr.* **21**, 553–571.

- NELSON, N. (1992). The vacuolar H<sup>+</sup>-ATPases – one of the most fundamental ion pumps in nature. *J. exp. Biol.* **172**, 19–27.
- PEDERSEN, P. L. AND CARAFOLI, E. (1987). Ion motive ATPases. I. Ubiquity, properties and significance in cell function. *Trends biochem. Sci.* **12**, 146–150.
- PUOPOLO, K., SOZEKAN, M., MAGNER, R. AND FORGAC, M. (1992). The 40-KDa subunit enhances but is not required for activity of the coated vesicle proton pump. *J. biol. Chem.* **267**, 5171–5176.
- QUICK, W. P. AND MILLS, J. D. (1986). Thiol modulation of chloroplast CF<sub>0</sub>-F<sub>1</sub> in isolated barley protoplasts and its significance to regulation of carbon dioxide fixation. *Biochim. biophys. Acta* **851**, 166–172.
- RACKER, E. (1965). *Mechanisms in Bioenergetics*. New York: Academic Press.
- RICHTER, M. L., PATRIE, W. J. AND MCCARTY, R. E. (1984). Preparation of the  $\epsilon$  subunit and  $\epsilon$  subunit-deficient chloroplast coupling factor 1 in active forms. *J. biol. Chem.* **259**, 7371–7373.
- SHAPIRO, A. B., GIBSON, K. D., SCHERAGA, H. A. AND MCCARTY, R. E. (1991). Fluorescence resonance energy transfer mapping of the fourth of six nucleotide-binding sites of chloroplast coupling factor 1. *J. biol. Chem.* **265**, 17276–17285.
- SHAPIRO, A. B. AND MCCARTY, R. E. (1990). Substrate binding-induced alteration of nucleotide binding site properties of chloroplast coupling factor 1. *J. biol. Chem.* **265**, 4340–4347.
- SOTEROPOULOS, P., SÜSS, K. H. AND MCCARTY, R. E. (1992). Modification of the  $\gamma$  subunit of chloroplast coupling factor 1 after its interactions with its inhibitory  $\epsilon$  subunit. *J. biol. Chem.* **267**, 10348–10354.
- WALKER, J. E. AND COZENS, A. L. (1986). Evolution of ATP synthase. *Chemical Scripta* **26B**, 263–272.
- WARD, J. M., REINDERS, A., HSU, H.-T. AND SZE, H. (1992). Dissociation and reassembly of the vacuolar H<sup>+</sup>-ATPase complex from oat roots. *Plant Physiol.* **99**, 161–169.
